# Supplementary material
Source: PubMed Central journal article supplement (PMC5963734)
Supplement: NIHMS937021-supplement.pdf [file NIHMS937021-supplement.pdf]

**A** GST Fusion Protein

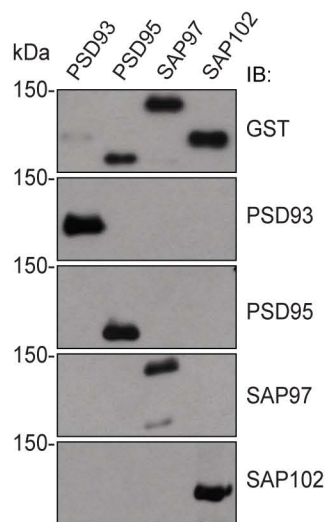

**B** Resin: GST-tagged PSD-95 full-length

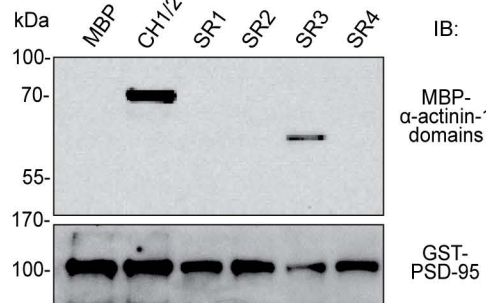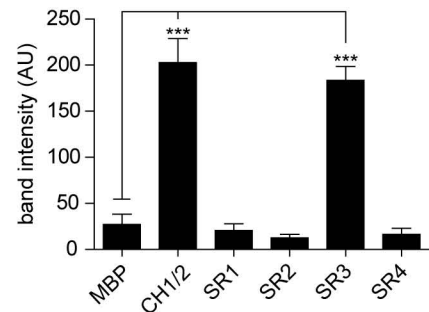

**C** Resin: GST-tagged PSD-95 full-length

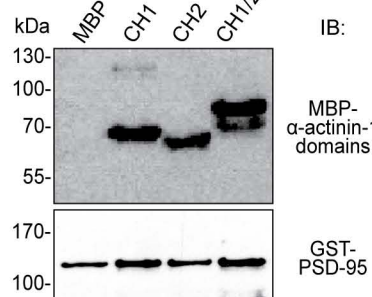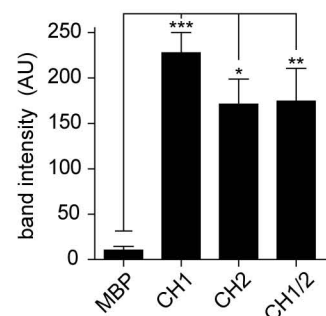

**D** Resin: GST-tagged PSD-95 full-length

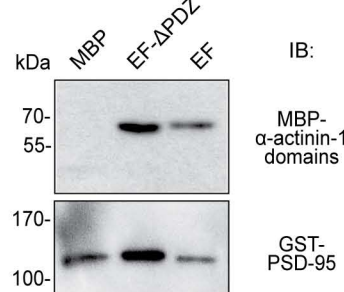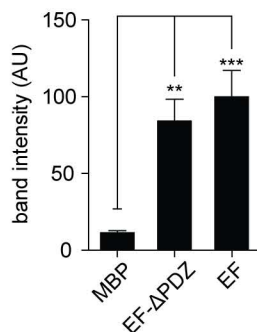

**F** Resin: GST

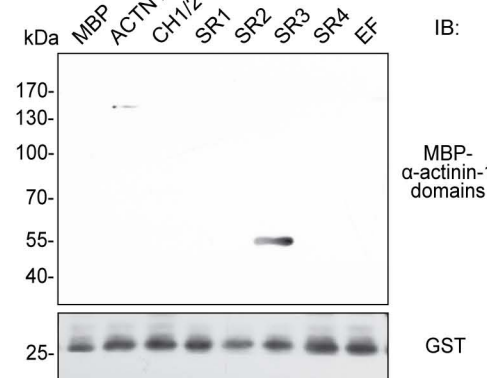

**E** Resin: GST-tagged PSD-95 N-term

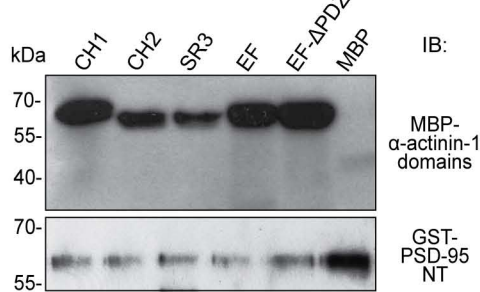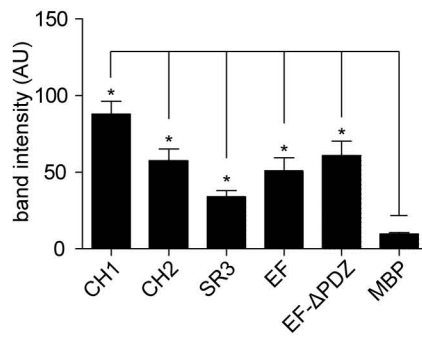

**Figure S1. Antibodies against PSD-93, PSD-95, SAP97, and SAP102 and interactions of full-length PSD-95 with  $\alpha$ -actinin-1 CH1/2 and EF-hand domains but not with SR3 are specific, related to Figure 1.**

**(A)** GST fusion proteins of PSD-93, PSD-95, SAP97 and SAP102 were expressed in *E. coli* and affinity purified on glutathione Sepharose before immunoblotting with antibodies against GST, PSD-93, PSD-95, SAP97 and SAP102. The amounts of loaded GST fusion proteins were adjusted over several trials so that immunosignals of individual bands with the individual antibodies resulted in comparable signal strength for each protein to compare their relative specificities except GST, which was used to illustrate the respective amount of protein loaded. Of note, much smaller amount of PSD-93 than of the other three proteins had to be loaded as reflected by the low signal with anti-GST (top) to obtain comparable signals indicating that the anti-PSD-93 antibody is much stronger for IB than the other three antibodies.

**(B)** Top: Pull-down of MBP-tagged  $\alpha$ -actinin domains but not MBP alone by immobilized full-length PSD-95. Bottom: IB with anti-GST antibody indicates that comparable amounts of PSD-95 were present in all samples. Right: Densitometric MBP quantification (in AU: MBP:  $27.1 \pm 11.2$ ; CH1/2:  $202.8 \pm 26.1$ ; SR1:  $20.6 \pm 7.2$ ; SR2:  $12.6 \pm 3.7$ ; SR3:  $183.5 \pm 15.2$ ; SR4:  $16.4 \pm 6.6$ ).

**(C)** Top: Pull-down of MBP-tagged  $\alpha$ -actinin CH1, CH2 and CH1/2 domains but not MBP alone by immobilized full-length PSD-95. Bottom IB with anti-GST antibody indicates comparable amounts of PSD-95 in all samples. Right: Densitometric quantification of MBP signals (in AU: MBP:  $10.4 \pm 4.3$ ; CH1:  $227.8 \pm 22.3$ ; CH2:  $171.1 \pm 27.6$ ; CH1/2:  $174.3 \pm 36.23$ ; n = 5).

**(D)** Top: Pull-down of MBP-tagged  $\alpha$ -actinin EF-hand domain and EF-hand domain lacking the C-terminal PDZ ligand (EF- $\Delta$ PDZ) but not MBP alone by immobilized full-length PSD-95. Bottom: IB with anti-GST antibody indicates that comparable amounts of PSD-95 were present in all samples. Right: Densitometric quantification (in AU: MBP:  $11.4 \pm 1.3$ ; EF- $\Delta$ PDZ:  $84.3 \pm 14.1$ ; EF:  $100 \pm 17.3$ ; n = 8).

**(E)** Top: Pull-down of MBP-tagged  $\alpha$ -actinin domains but not MBP alone by immobilized PSD-95 residues 1-71 (PSD-95 N-term). Bottom: Comparable amounts of PSD-95 were present in all samples. Right: Densitometric quantification (in AU: CH1:  $88.4 \pm 9.6$ ; CH2:  $57.5 \pm 7.3$ ; SR3:  $34.4 \pm 4.0$ ; EF:  $51.4 \pm 8.2$ ; EF- $\Delta$ PDZ:  $61.4 \pm 9.6$ ; MBP:  $11.0 \pm 1.1$ ).

**(F)** Top: Pull-down of MBP-tagged full-length  $\alpha$ -actinin and SR3 but none of the other  $\alpha$ -actinin domains by immobilized GST. Bottom: Equal amounts of GST were present in all samples.

Statistical significance was tested by 1-way ANOVA with Dunnett's Multiple Comparison Test.

Figure S2

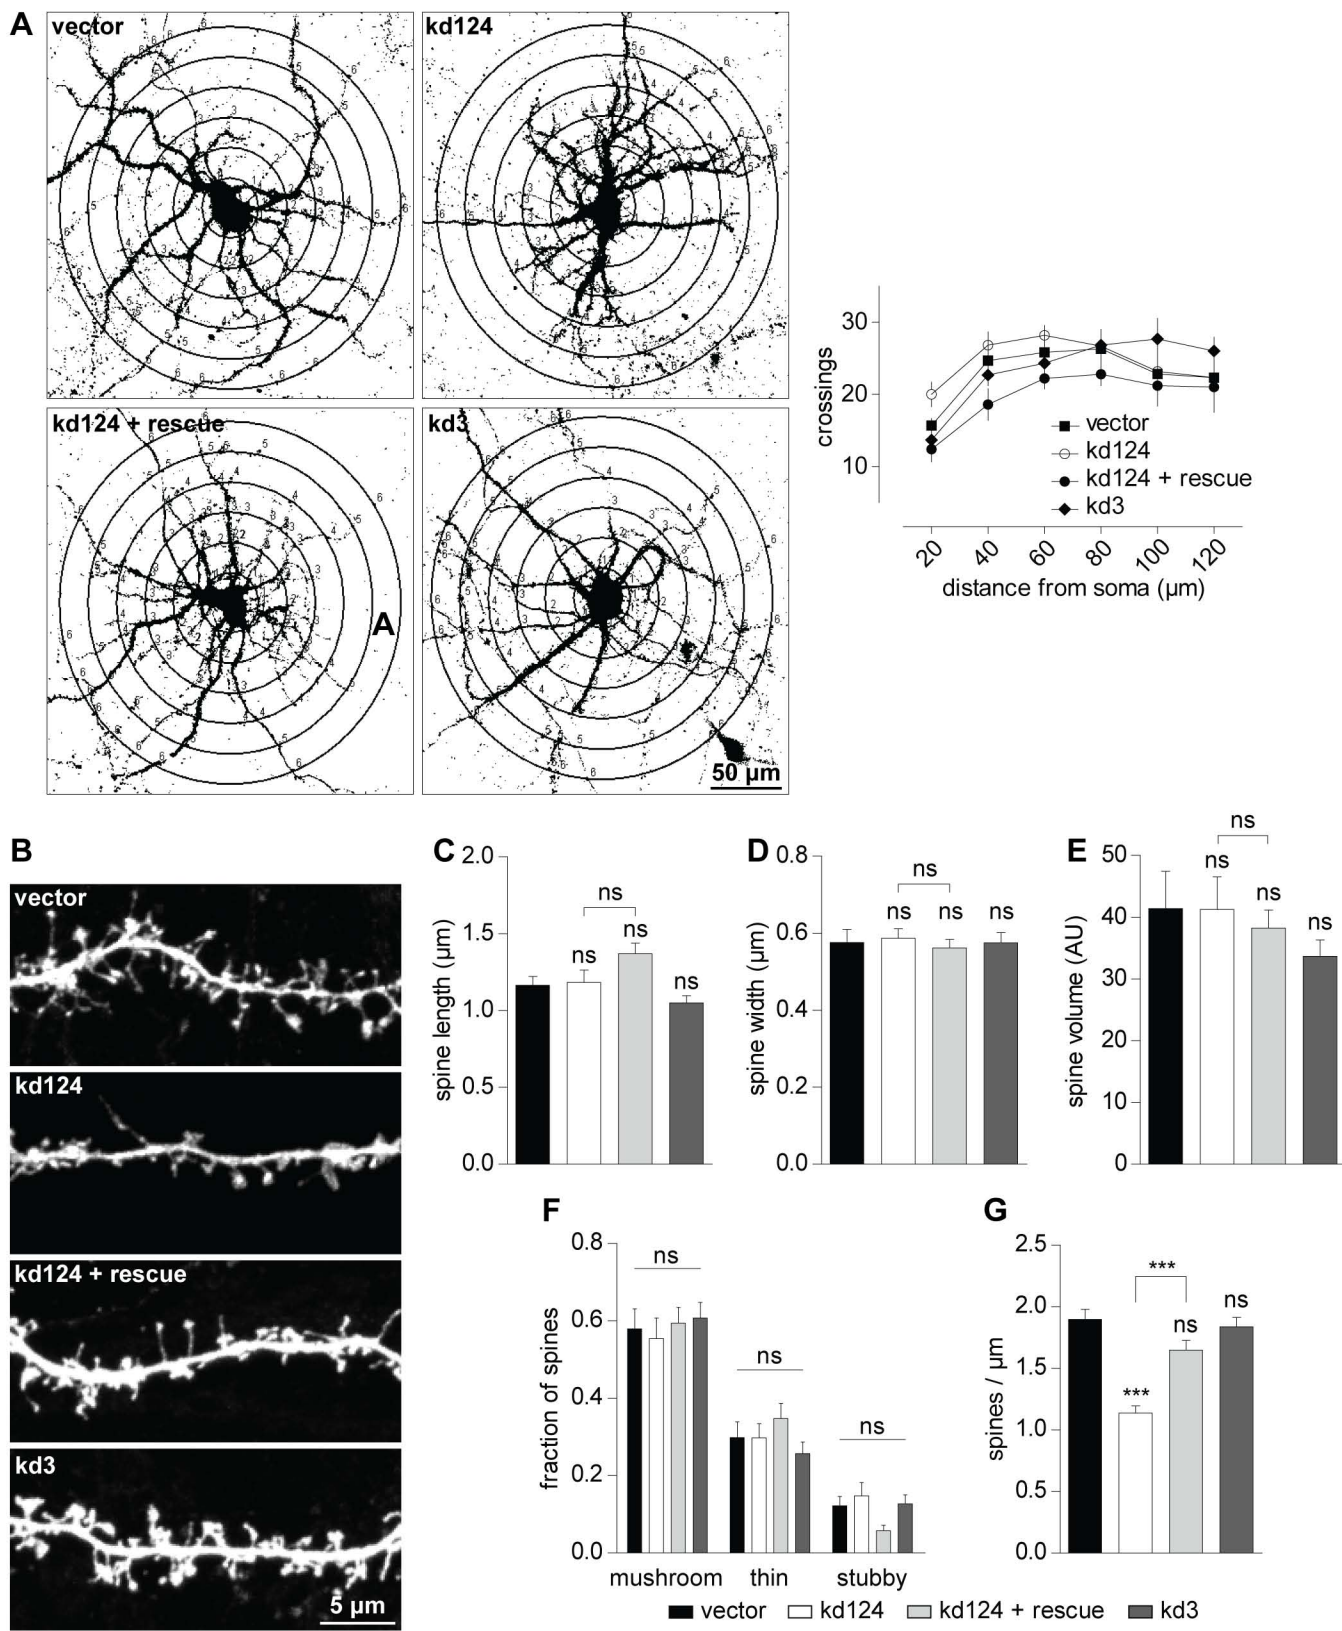

**Figure S2. Knockdown of  $\alpha$ -actinin reduces spine density without influencing the morphology of dendrites and spines, related to Figure 2.**

Primary embryonic rat hippocampal cultures were transfected at 4 DIV and fixed at 18 DIV. Parental pSilencer vector encoding eGFP from an independent promoter (vector) and shRNA against  $\alpha$ -actinin-3 (kd3), which is not expressed in neurons, served as control.  $\alpha$ -actinin-1, -2, and -4 were knocked-down with specific shRNAs (kd124; Hall et al., 2013; Schnizler et al., 2009) while shRNA-insensitive  $\alpha$ -actinin-1\* rescue was co-expressed (Hall et al., 2013).

(A) The number of dendrites crossing each concentric circle was not different for kd124 compared to vector, kd124 + rescue, as well as kd3. Images were taken at low magnification on an epifluorescence microscope and transformed into binary images using thresholding. Quantification in the right panel.

(B-G) Confocal Z-stacks of transfected cells were taken using a 100x objective lens (B). Individual Z-slices to measure spine length, width, and volume as well as to assess spine type (C-F), while maximum-intensity projections served to count spine density (G). For each analysis, the experimenter was blinded to the conditions.

(C) The length of individual spines is not altered after transfection with kd124, kd124 + rescue, or kd3 (in  $\mu\text{m}$ : vector:  $1.17 \pm 0.06$ ; kd124:  $1.18 \pm 0.08$ ; kd124 + rescue:  $1.37 \pm 0.07$ ; kd3:  $1.05 \pm 0.05$ ;  $n > 21$  images from 4 independent experiments).

(D) Spine width is not altered by kd124, kd124 + rescue, or kd3 (in  $\mu\text{m}$ : vector:  $0.58 \pm 0.03$ ; kd124:  $0.59 \pm 0.02$ ; kd124 + rescue:  $0.56 \pm 0.02$ ; kd3:  $0.58 \pm 0.03$ ;  $n > 21$  images from 4 independent experiments).

(E) Spine volume is not changed by kd124, kd124 + rescue, or kd3 (in AU: vector:  $41.4 \pm 6.0$ ; kd124:  $41.3 \pm 5.2$ ; kd124 + rescue:  $38.2 \pm 2.9$ ; kd3:  $33.7 \pm 2.7$ ;  $n > 21$  images from 4 independent experiments).

(F) Expression of kd124, kd124 + rescue, or kd3 did not influence the overall distribution of spine types in transfected neurons (mushroom (m), thin (t), stubby (s): vector: m:  $0.58 \pm 0.05$ , t:  $0.30 \pm 0.04$ , s:  $0.12 \pm 0.02$ ; kd124: m:  $0.55 \pm 0.05$ , t:  $0.30 \pm 0.04$ , s:  $0.15 \pm 0.03$ ; kd124 + rescue: m:  $0.60 \pm 0.04$ , t:  $0.35 \pm 0.04$ , s:  $0.05 \pm 0.01$ ; kd3: m:  $0.61 \pm 0.04$ , t:  $0.26 \pm 0.03$ , s:  $0.13 \pm 0.02$ ;  $n > 21$  images from 4 independent experiments).

(G) The spine density is significantly reduced by kd124, but not by kd124 + rescue or kd3 (in  $\mu\text{m}^{-1}$ : vector:  $1.90 \pm 0.08$ ; kd124:  $1.14 \pm 0.06$ ; kd124 + rescue:  $1.65 \pm 0.08$ ; kd3:  $1.84 \pm 0.08$ ;  $n > 45$  images from  $> 22$  cells from 5 independent experiments).

Statistical significance was tested by 1-way ANOVA with Bonferroni's Multiple Comparison Test.

Figure S3

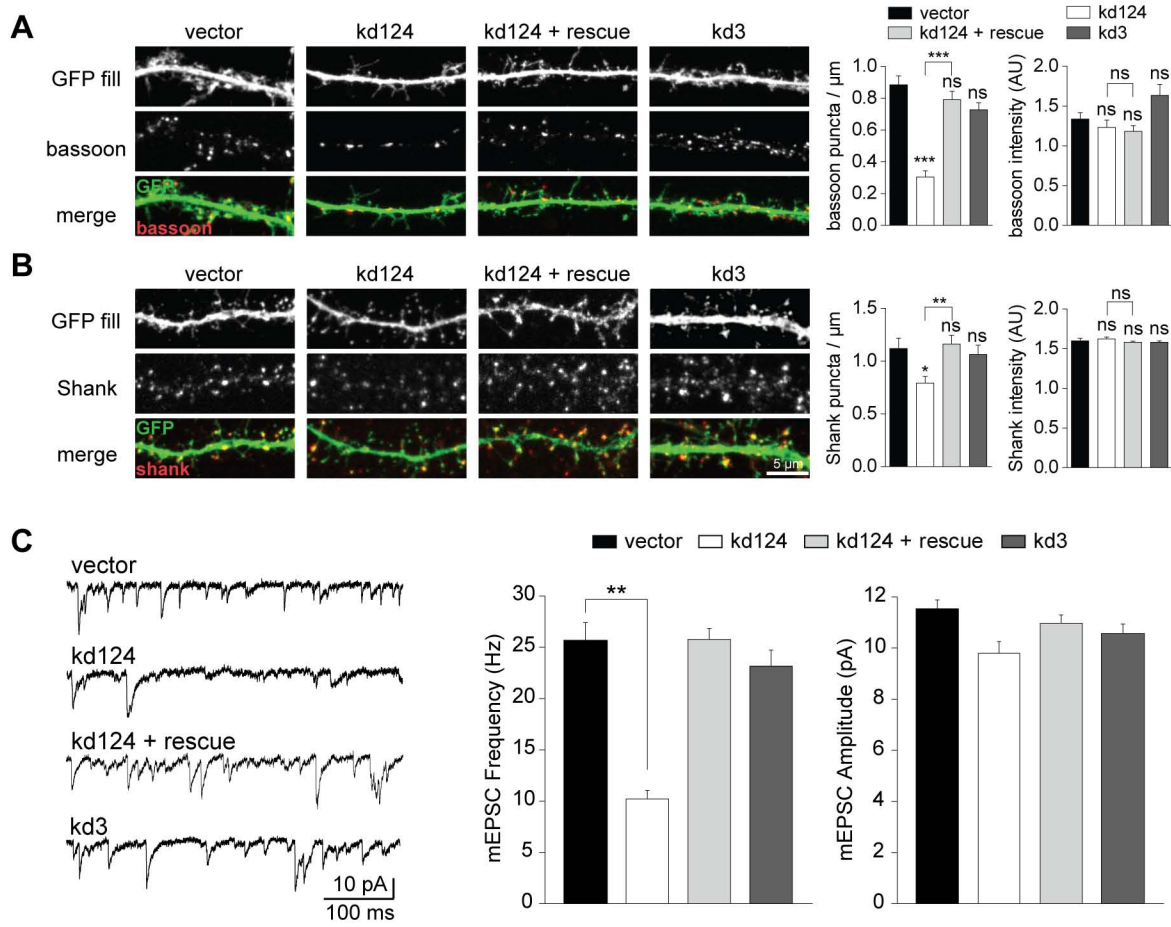

**Figure S3.  $\alpha$ -actinin kd reduces density but not intensity of bassoon and Shank IF puncta and reduces mEPSC frequency but not amplitude, related to Figure 2.**

Hippocampal cultures were transfected and fixed as in Figure 4. Cells were used for whole-cell patch-clamp experiments at DIV 11-14 or fixed and stained at 18 DIV

**(A)** Puncta density of bassoon was significantly reduced by kd124 but not by kd124 + rescue or kd3 (in  $\mu\text{m}^{-1}$ : vector:  $0.88 \pm 0.06$ ; kd124:  $0.31 \pm 0.04$ ; kd124 + rescue:  $0.79 \pm 0.05$ ; kd3:  $0.72 \pm 0.05$ ). Puncta intensity was not affected (in AU: vector:  $1.34 \pm 0.08$ ; kd124:  $1.23 \pm 0.09$ ; kd124 + rescue:  $1.2 \pm 0.07$ ; kd3:  $1.63 \pm 0.14$ ;  $n > 53$  images from  $> 26$  cells from 5 independent experiments).

**(B)** Puncta density of Shank was reduced by kd124 but not by kd124 + rescue or kd3 (in  $\mu\text{m}^{-1}$ : vector:  $1.12 \pm 0.10$ ; kd124:  $0.79 \pm 0.06$ ; kd124 + rescue:  $1.16 \pm 0.08$ ; kd3:  $1.06 \pm 0.09$ ). Puncta intensity was not affected (in AU: vector:  $1.60 \pm 0.03$ ; kd124:  $1.62 \pm 0.02$ ; kd124 + rescue:  $1.58 \pm 0.02$ ; kd3:  $1.58 \pm 0.02$ ;  $n > 34$  images from  $> 17$  cells from 3 independent experiments).

**(C, D)** mEPSC frequency was significantly reduced by kd124 but not by kd124 + rescue or kd3 (in Hz: vector:  $25.7 \pm 1.8$ ; kd124:  $10.2 \pm 0.8$ ; kd124 + rescue:  $25.7 \pm 1.1$ ; kd3:  $23.1 \pm 1.6$ ). mEPSC amplitude was not altered by either kd or co-expression of rescue (in pA: vector:  $11.5 \pm 0.3$ ; kd124:  $9.8 \pm 0.4$ ; kd124 + rescue:  $11.0 \pm 0.3$ ; kd3:  $10.5 \pm 0.4$ ).

Statistical significance was tested by 1-way ANOVA with Bonferroni's Multiple Comparison Test.

Figure S4

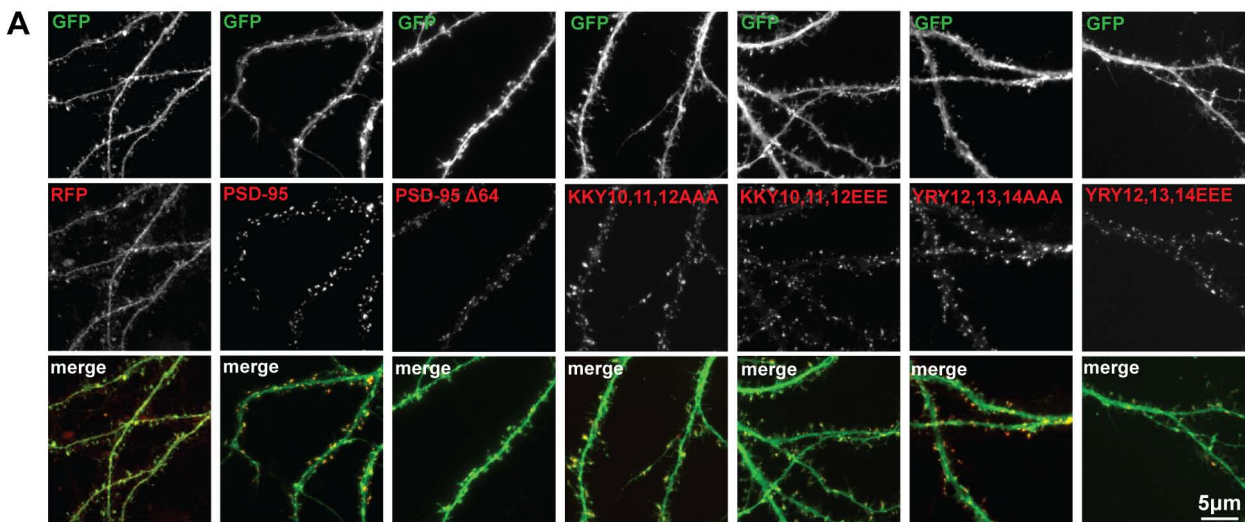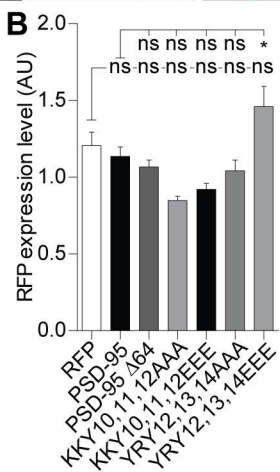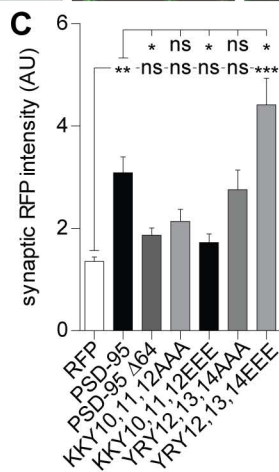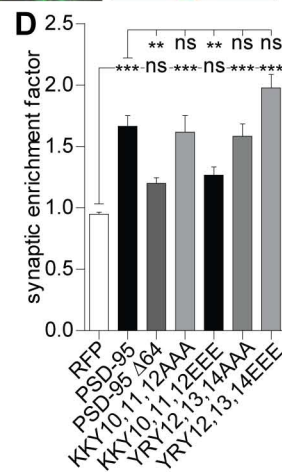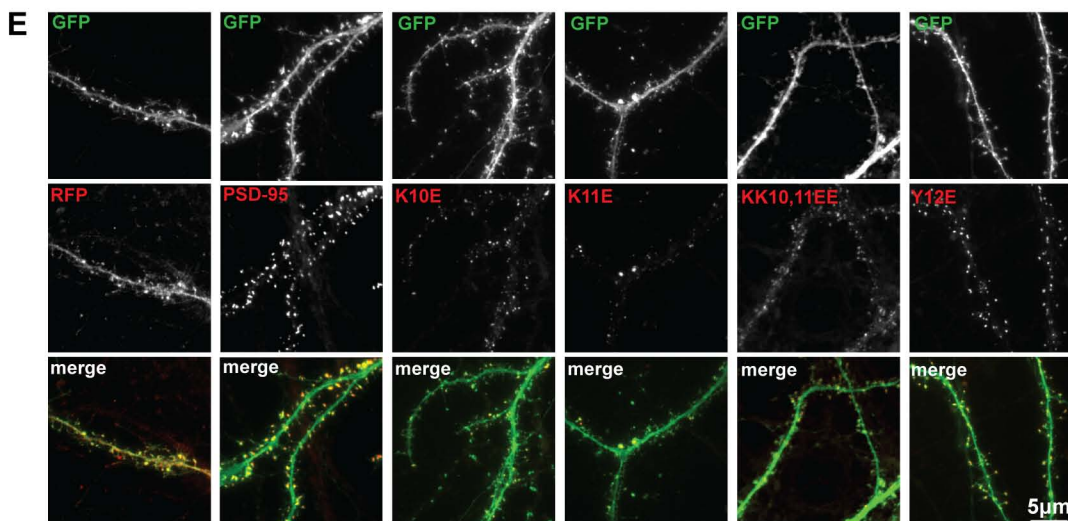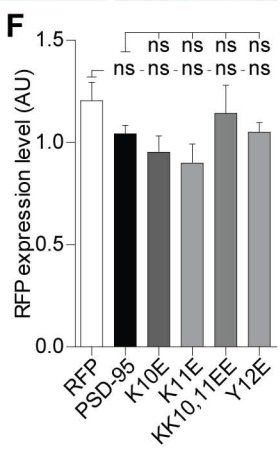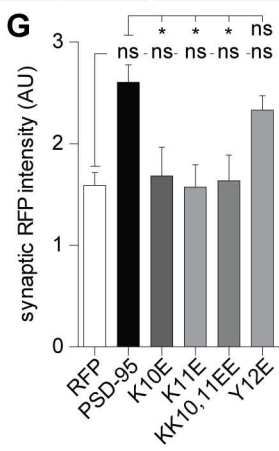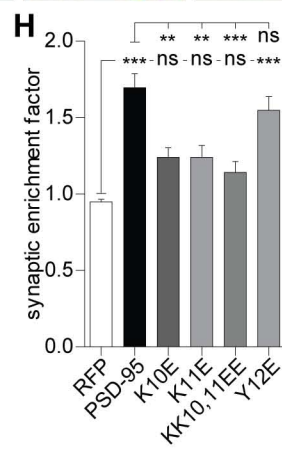

**Figure S4. Role of PSD-95 N-terminus and residues 10-14 in synaptic targeting of PSD-95, related to Figure 4.**

Hippocampal cultures were transfected at 7 DIV with GFP as cell-fill and RFP-tagged PSD-95, fixed at 18 DIV and imaged by epifluorescence microscopy with a 100x objective lens.

(A) Representative images of cells transfected with PSD-95<sup>WT</sup>, PSD-95 Δ64, PSD-95<sup>KKY10,11,12EEE</sup>, PSD-95<sup>KKY10,11,12AAA</sup>, PSD-95<sup>YRY12,13,14AAA</sup>, PSD-95<sup>YRY12,13,14EEE</sup>.

(B) Expression levels were comparable between all the mutated constructs in (A) with the exception of PSD-95<sup>YRY12,13,14EEE</sup> which showed slightly higher expression as estimated by cell-wide RFP fluorescence intensity normalized to cell-wide GFP fluorescence intensity (in AU: RFP:  $1.21 \pm 0.09$ ; PSD-95<sup>WT</sup>:  $1.14 \pm 0.06$ ; PSD-95 Δ64:  $1.07 \pm 0.04$ ; PSD-95<sup>KKY10,11,12AAA</sup>:  $0.85 \pm 0.03$ ; PSD-95<sup>KKY10,11,12EEE</sup>:  $0.92 \pm 0.04$ ; PSD-95<sup>YRY12,13,14AAA</sup>:  $1.04 \pm 0.07$ ; PSD-95<sup>YRY12,13,14EEE</sup>:  $1.46 \pm 0.13$ ).

(C) Synaptic RFP intensity in spines normalized to cell-wide GFP intensity was significantly increased vs RFP only for PSD-95<sup>WT</sup> and PSD-95<sup>YRY12,13,14EEE</sup> (in AU: RFP:  $1.35 \pm 0.09$ ; PSD-95<sup>WT</sup>:  $3.09 \pm 0.31$ ; PSD-95 Δ64:  $1.86 \pm 0.14$ ; PSD-95<sup>KKY10,11,12AAA</sup>:  $2.14 \pm 0.23$ ; PSD-95<sup>KKY10,11,12EEE</sup>:  $1.72 \pm 0.17$ ; PSD-95<sup>YRY12,13,14AAA</sup>:  $2.76 \pm 0.39$ ; PSD-95<sup>YRY12,13,14EEE</sup>:  $4.42 \pm 0.52$ ).

(D) Synaptic enrichment was significantly increased vs RFP for all PSD-95 constructs except PSD-95 Δ64 and PSD-95<sup>YRY10,11,12EEE</sup> (RFP:  $0.95 \pm 0.02$ ; PSD-95<sup>WT</sup>:  $1.67 \pm 0.09$ ; PSD-95 Δ64:  $1.20 \pm 0.04$ ; PSD-95<sup>KKY10,11,12AAA</sup>:  $1.62 \pm 0.13$ ; PSD-95<sup>KKY10,11,12EEE</sup>:  $1.27 \pm 0.07$ ; PSD-95<sup>YRY12,13,14AAA</sup>:  $1.58 \pm 0.10$ ; PSD-95<sup>YRY12,13,14EEE</sup>:  $1.98 \pm 0.11$ ).

(B-D) n>19 images from > 9 cells from 3 independent experiments.

(E) Representative images of cells transfected with PSD-95<sup>WT</sup>, PSD-95<sup>K10E</sup>, PSD-95<sup>K11E</sup>, PSD-95<sup>KK10,11EE</sup>, and PSD-95<sup>Y12E</sup>.

(F) Expression levels were comparable between all constructs in (E) (in AU: RFP:  $1.21 \pm 0.09$ ; PSD-95<sup>WT</sup>:  $1.04 \pm 0.04$ ; PSD-95<sup>K10E</sup>:  $0.95 \pm 0.08$ ; PSD-95<sup>K11E</sup>:  $0.90 \pm 0.09$ ; PSD-95<sup>KK10,11EE</sup>:  $1.14 \pm 0.14$ ; PSD-95<sup>Y12E</sup>:  $1.05 \pm 0.05$ ).

(G) Synaptic RFP intensity in spines normalized to cell-wide GFP intensity was significantly increases vs RFP only for PSD-95<sup>WT</sup> (in AU: RFP:  $1.59 \pm 0.13$ ; PSD-95<sup>WT</sup>:  $2.60 \pm 0.17$ ; PSD-95<sup>K10E</sup>:  $1.68 \pm 0.$ ; PSD-95<sup>K11E</sup>:  $1.57 \pm 0.22$ ; PSD-95<sup>KK10,11EE</sup>:  $1.64 \pm 0.25$ ; PSD-95<sup>Y12E</sup>:  $2.33 \pm 0.14$ ).

(H) Synaptic enrichment was significantly increased vs RFP only for PSD-95<sup>WT</sup> and PSD-95<sup>Y12E</sup> (in AU: RFP:  $0.94 \pm 0.03$ ; PSD-95<sup>WT</sup>:  $1.70 \pm 0.09$ ; PSD-95<sup>K10E</sup>:  $1.24 \pm 0.06$ ; PSD-95<sup>K11E</sup>:  $1.24 \pm 0.08$ ; PSD-95<sup>KK10,11EE</sup>:  $1.14 \pm 0.07$ ; PSD-95<sup>Y12E</sup>:  $1.55 \pm 0.09$ ).

(F-H) n>18 images from > 9 cells from 3 independent experiments.

Statistical significance was tested by 1-way ANOVA with Bonferroni's Multiple Comparison Test.



Figure S5

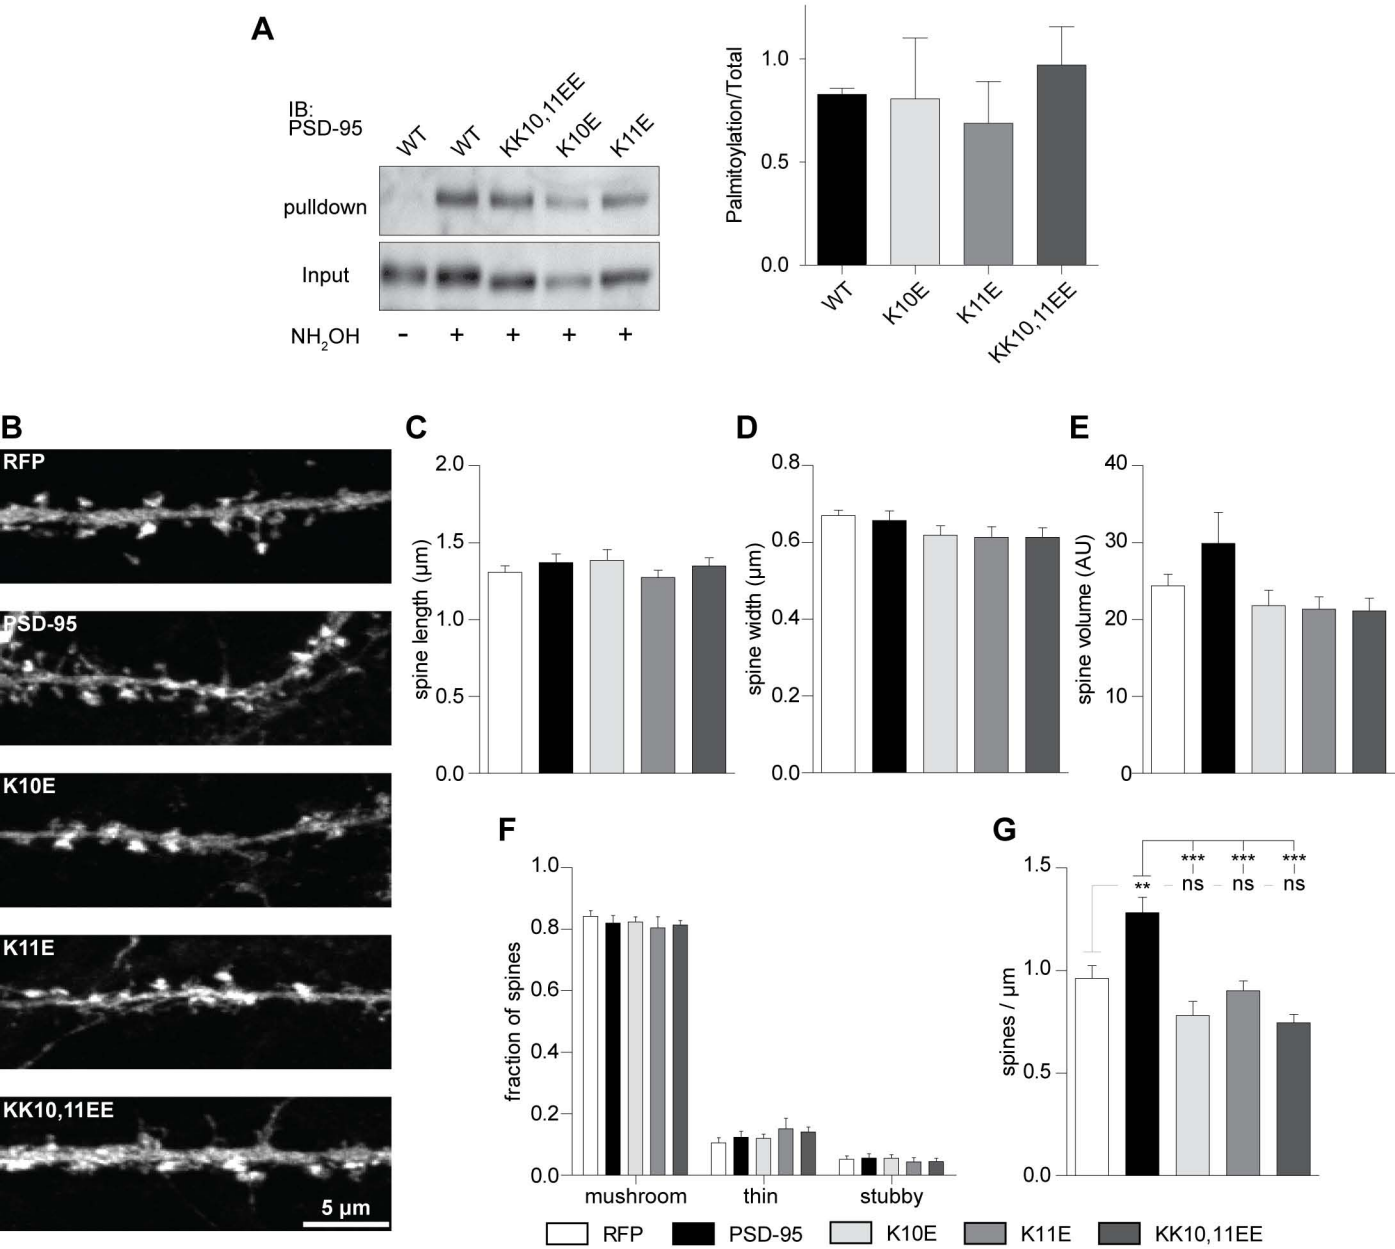

**Figure S5. Spine morphology and PSD-95 palmitoylation levels were unaltered but spine density was reduced after overexpression of PSD-95 mutants, related to Figure 5.**

(A) HEK293T cells were transfected with RFP-tagged PSD-95<sup>WT</sup>, PSD-95<sup>K10E</sup>, PSD-95<sup>K11E</sup>, and PSD-95<sup>KK10,11EE</sup>. After 24h cells were lysed and free thiols alkylated with NEM. Palmitoyl-Cysteine thioesters were hydrolysed with NH<sub>2</sub>OH before freed thiols were biotinylated. NeutrAvidin was used to pull-down biotinylated proteins followed by immunoblotting for PSD-95. Palmitoylation levels of PSD-95 mutants were not different from the wild-type. Omission of NH<sub>2</sub>OH prevented pull-down proving the specificity of the procedure (left lane). The left panel shows a representative immunoblot, the right panel densitometric quantification (PSD-95<sup>WT</sup>: 0.83 ± 0.03; PSD-95<sup>K10E</sup>: 0.81 ± 0.29; PSD-95<sup>K11E</sup>: 0.69 ± 0.20; PSD-95<sup>KK10,11EE</sup>: 0.97 ± 0.19; n = 3).

(B-G) Primary embryonic rat hippocampal cultures were transfected at 7 DIV with GFP as cell-fill and RFP-tagged PSD-95 mutations. Cells were fixed at 18 DIV.

(B) Z-stacks were taken with a confocal laser-scanning microscope with 100x objective lens. Individual Z-slices were used for measuring spine length, width, and volume as well as to assess spine type (C-F). Maximum-intensity projections were used to count spine density (G). For each analysis, the experimenter was blinded to the conditions.

(C) Spine length was not altered by any PSD-95 mutant vs RFP alone or PSD-95<sup>WT</sup> (in μm: RFP: 1.31 ± 0.04; PSD-95<sup>WT</sup>: 1.37 ± 0.06; PSD-95<sup>K10E</sup>: 1.38 ± 0.07; PSD-95<sup>K11E</sup>: 1.27 ± 0.05; PSD-95<sup>KK10,11EE</sup>: 1.35 ± 0.05).

(D) Spine width was not altered by any of the PSD-95 mutants vs RFP or PSD-95<sup>WT</sup> (in μm: RFP: 0.67 ± 0.01; PSD-95<sup>WT</sup>: 0.66 ± 0.03; PSD-95<sup>K10E</sup>: 0.62 ± 0.03; PSD-95<sup>K11E</sup>: 0.61 ± 0.02; PSD-95<sup>KK10,11EE</sup>: 0.61 ± 0.02).

(E) Spine volume was not altered by any of the PSD-95 mutants vs RFP or PSD-95<sup>WT</sup> (in AU: RFP: 24.4 ± 1.5; PSD-95<sup>WT</sup>: 29.9 ± 4.0; PSD-95<sup>K10E</sup>: 21.8 ± 2.0; PSD-95<sup>K11E</sup>: 21.3 ± 1.6; PSD-95<sup>KK10,11EE</sup>: 21.1 ± 1.7; n > 22 images from > 11 cells from 3 independent experiments).

(F) Spine type distribution is the same for all examined conditions (mushroom (m), thin (t), stubby (s): RFP: m: 0.84 ± 0.02, t: 0.11 ± 0.02, s: 0.05 ± 0.01; PSD-95: m: 0.82 ± 0.02, t: 0.12 ± 0.02, s: 0.06 ± 0.01; K10E: m: 0.82 ± 0.02, t: 0.12 ± 0.01, s: 0.06 ± 0.01; K11E: m: 0.80 ± 0.04, t: 0.15 ± 0.03, s: 0.04 ± 0.01; KK10,11EE: m: 0.81 ± 0.01, t: 0.14 ± 0.02, s: 0.04 ± 0.01).

(G) Spine density was significantly increased by PSD-95<sup>WT</sup> but not PSD-95 mutants vs RFP. All PSD-95 mutants had significantly lower spine density than PSD-95<sup>WT</sup> (in μm<sup>-1</sup>: RFP: 0.96 ± 0.06; PSD-95<sup>WT</sup>: 1.28 ± 0.07; PSD-95<sup>K10E</sup>: 0.78 ± 0.07; PSD-95<sup>K11E</sup>: 0.90 ± 0.05; PSD-95<sup>KK10,11EE</sup>: 0.75 ± 0.04; n > 8 images from > 8 cells from 2 independent experiments).

Statistical significance was tested by 1-way ANOVA with Dunnett's (A) or Bonferroni's Multiple Comparison Test (C-G).

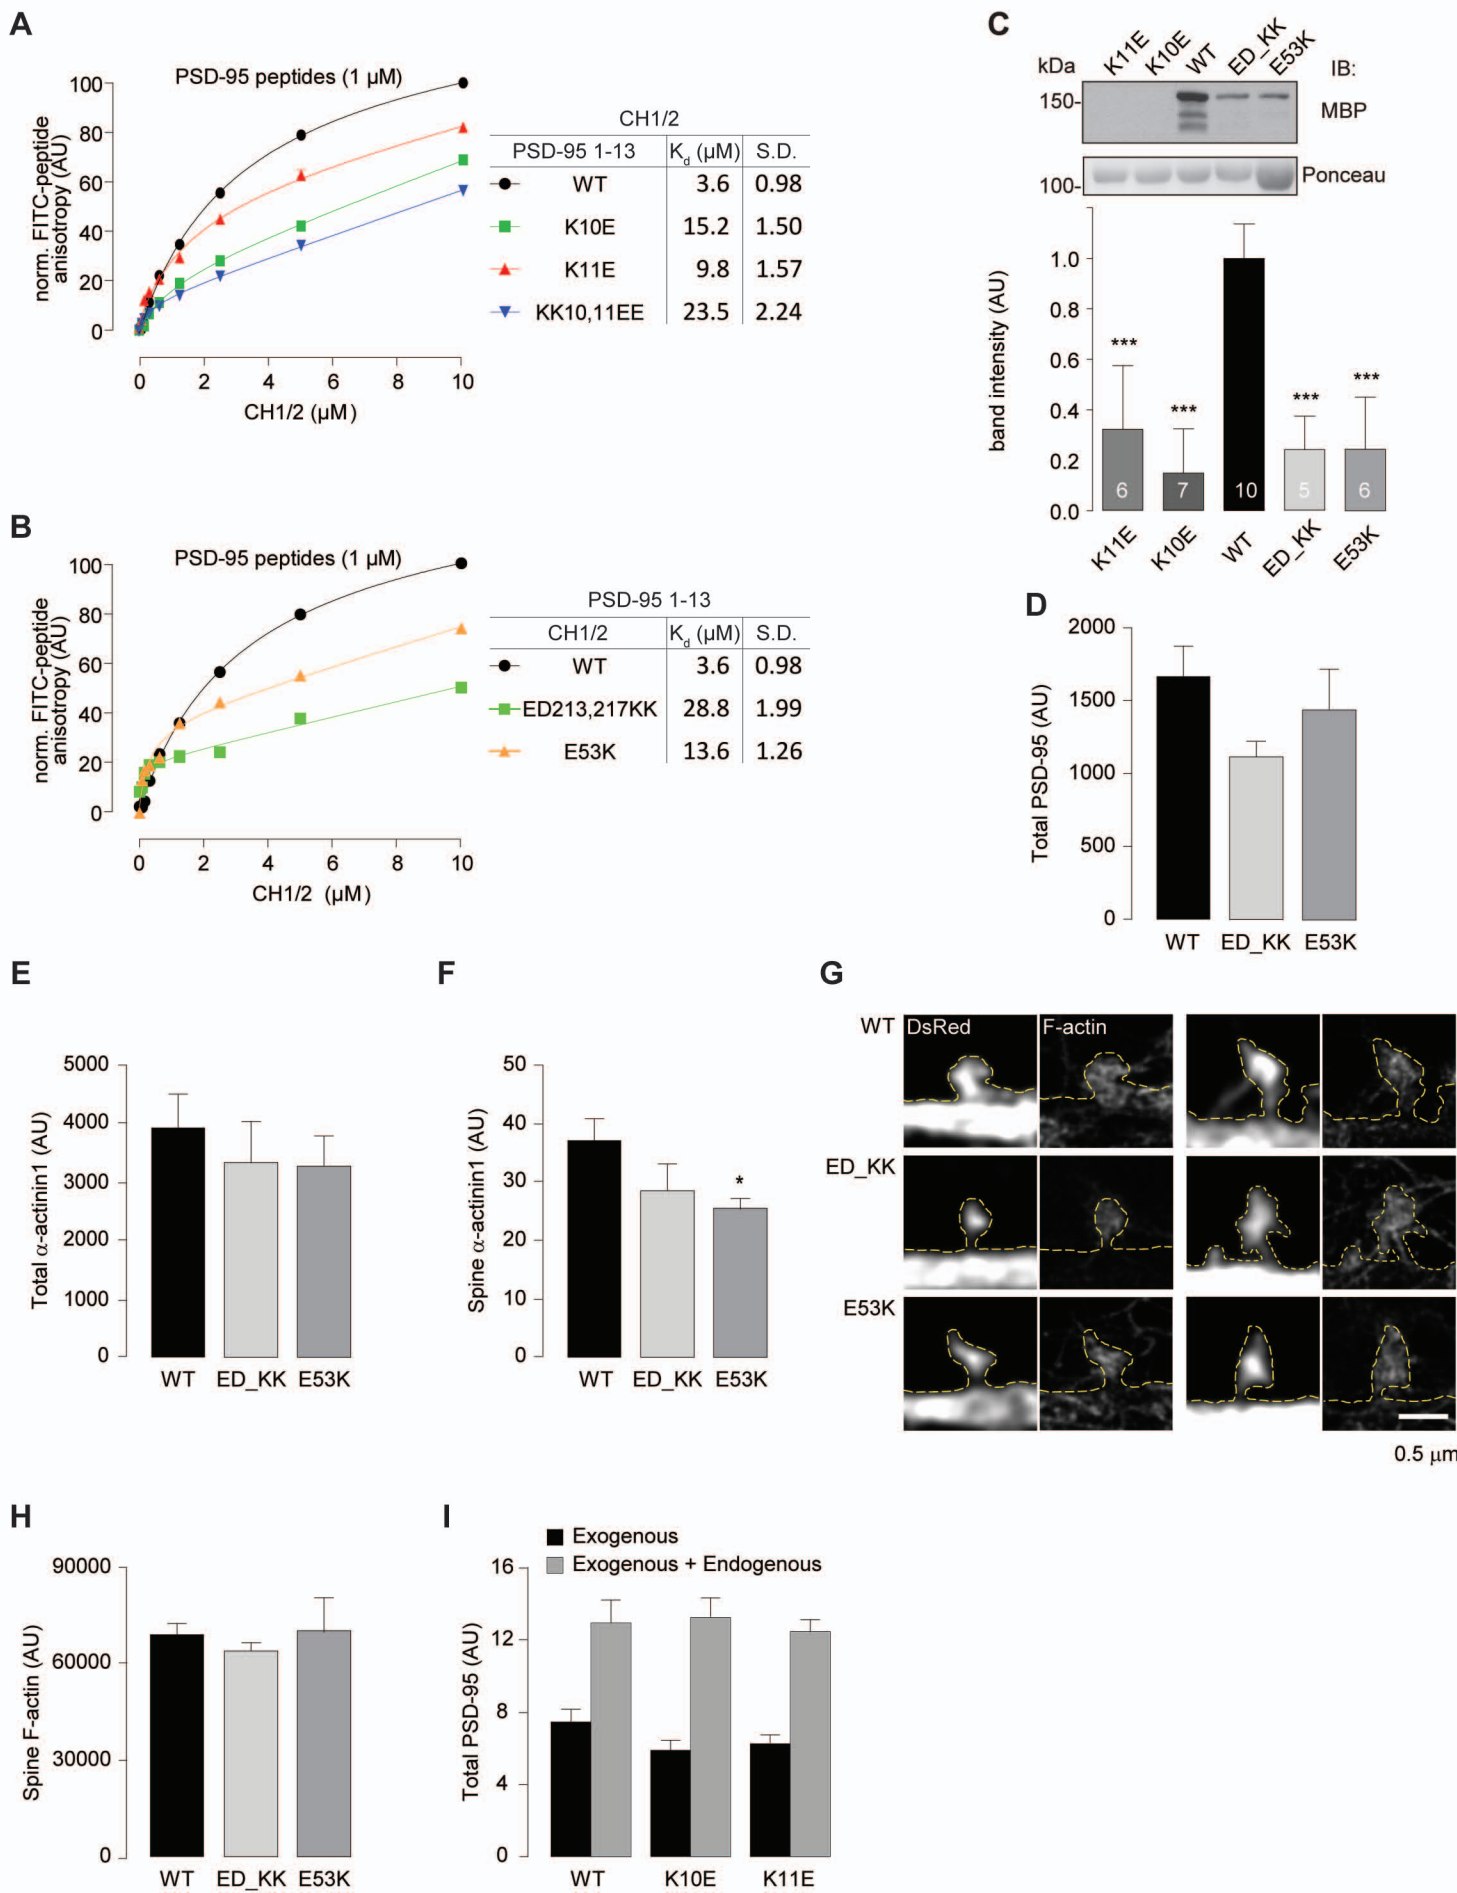

**Figure S6. Mutation of K10 and K11 on PSD-95 as well as E213 and D217 on  $\alpha$ -actinin-1 disrupts PSD-95 –  $\alpha$ -actinin interaction but not F-actin content of spines, related to Figure 6.**

(A,B) FP titration of N-terminally FITC-labeled peptides corresponding to residues 1-13 of PSD-95 (either with WT sequence or K10, K11, or both mutated to glutamate) with WT MBP-CH1-CH2 (A) or of PSD-95 1-13<sup>WT</sup> with MBP-CH1-CH2<sup>WT</sup>, MBP-CH1-CH2<sup>ED213/217KK</sup>, or MBP-CH1-CH2<sup>E53K</sup> (B). Titration curves are shown in the left panels;  $K_d$ -values for each interaction are given in the tables on the right. Every point corresponds to the average of 3 experiments.

Titration with CH1/2<sup>WT</sup> showed reduced binding for all three mutated peptides.

(C) Full length GST-PSD-95<sup>WT</sup>, PSD-95<sup>K10E</sup>, and PSD-95<sup>K11E</sup> were expressed in *E. coli* and comparable amounts immobilized as confirmed by Ponceau S-staining after transfer of gels (lower panel). Resins were incubated with equal amounts of full length MBP- $\alpha$ -actinin-1<sup>WT</sup>, MBP- $\alpha$ -actinin-1<sup>E53K</sup>, or MBP- $\alpha$ -actinin-1<sup>ED213/217KK</sup>. Compared to pull down of MBP- $\alpha$ -actinin-1<sup>WT</sup> with GST-PSD-95<sup>WT</sup>, pull down of MBP- $\alpha$ -actinin-1<sup>ED213/217KK</sup> and of  $\alpha$ -actinin-1<sup>E53K</sup> with GST-PSD-95<sup>WT</sup> was strongly reduced and pull down of MBP- $\alpha$ -actinin-1<sup>WT</sup> with GST-PSD-95<sup>K10E</sup> and GST-PSD-95<sup>K11E</sup> nearly absent in this experiment. Bar diagram (bottom) indicates averaged band intensities (in AU: GST-PSD-95<sup>K10E</sup> with MBP- $\alpha$ -actinin-1<sup>WT</sup>:  $0.32 \pm 0.10$  (n = 6); GST-PSD-95<sup>K11E</sup> with MBP- $\alpha$ -actinin-1<sup>WT</sup>:  $0.15 \pm 0.07$  (n = 7); GST-PSD-95<sup>WT</sup> with MBP- $\alpha$ -actinin-1<sup>WT</sup>:  $1.0 \pm 0.04$  (n = 10); GST-PSD-95<sup>WT</sup> with MBP- $\alpha$ -actinin-1<sup>ED213/217KK</sup>:  $0.24 \pm 0.06$  (n = 5); GST-PSD-95<sup>WT</sup> with MBP- $\alpha$ -actinin-1<sup>E53K</sup>:  $0.24 \pm 0.08$  (n = 6). From 10 different experiments.

(D-H) Hippocampal cultures were transfected at 7 DIV with  $\alpha$ -actinin kd124 plasmids and sh-RNA resistant plasmids for replacement of endogenous  $\alpha$ -actinin by  $\alpha$ -actinin-1<sup>WT</sup>,  $\alpha$ -actinin-1<sup>E53K</sup>, or  $\alpha$ -actinin-1<sup>ED213,217KK</sup>.

(D) Total PSD-95 levels as determined in dendritic areas including shaft and spines by IF signals with anti-PSD-95 antibody were comparable for neurons expressing  $\alpha$ -actinin-1<sup>WT</sup>,  $\alpha$ -actinin-1<sup>E53K</sup>, and  $\alpha$ -actinin-1<sup>ED213/217KK</sup> (in AU: WT:  $1678.03 \pm 205.05$  (n=22 cells); ED213/217KK (ED\_KK):  $1084.42 \pm 107.37$  (n=11); E53K:  $1447.60 \pm 277.31$  (n=16); from 2 independent experiments).

(E) Total  $\alpha$ -actinin-1 levels as determined in dendritic areas including shaft and spines by IF signals with  $\alpha$ -actinin-1 antibody were comparable for neurons expressing  $\alpha$ -actinin-1<sup>WT</sup>,  $\alpha$ -actinin-1<sup>E53K</sup>, and  $\alpha$ -actinin-1<sup>ED213/217KK</sup> (in AU: WT:  $3908.12 \pm 589.86$  (n=22 cells); ED\_KK:  $3319.60 \pm 705.79$  (n=11); E53K:  $3274.27 \pm 503.14$  (n=16); from 2 independent experiments).

(F)  $\alpha$ -actinin-1 levels as determined in spines by IF signals with  $\alpha$ -actinin-1 antibody were statistically significantly lower for neurons expressing  $\alpha$ -actinin-1<sup>E53K</sup> (but not  $\alpha$ -actinin-1<sup>ED213/217KK</sup>) vs  $\alpha$ -actinin-1<sup>WT</sup> (in AU: WT:  $36.92 \pm 3.89$  (n=22 cells); ED\_KK:  $28.58 \pm 4.52$  (n=11); E53K:  $25.39 \pm 1.79$  (n=16); from 2 independent experiments).

(G) Sample images of F-actin in spines. DsRed expressed from the shRNA vectors (pSilencer) was used to visualize spine shape in the confocal microscopy mode. F-actin was imaged using Alexa488-conjugated phalloidin in STED microscopy mode.

(H) F-actin levels in spines were comparable for neurons expressing  $\alpha$ -actinin-1<sup>WT</sup>,  $\alpha$ -actinin-1<sup>E53K</sup>, and  $\alpha$ -actinin-1<sup>ED213/217KK</sup> (in AU: WT:  $69095.09 \pm 3056.02$  (n=15 cells); ED\_KK:  $63951.24 \pm 2445.52$  (n=21); E53K:  $70493.01 \pm 9642.24$  (n=13); from 6 independent experiments).

(I,J) Hippocampal cultures were infected with a virus carrying shRNA to knock down endogenous PSD-95 and sh-resistant cDNA for ectopic expression of GFP-PSD-95\* (Schluter et al., 2006).

(I) Total PSD-95 levels as determined in dendritic areas including shaft and spines by IF signals with anti-PSD-95 antibody (grey bars) as well as total levels of ectopically expressed GFP-PSD-95 as determined by GFP signals (black bars) were comparable for neurons expressing GFP-PSD-95<sup>WT</sup>, GFP-PSD-95<sup>K10E</sup>, and GFP-PSD-95<sup>K11E</sup> (in AU: exogenous PSD-95: WT:  $7.34 \pm 0.63$  (n=19 cells); K10E:  $5.87 \pm 0.59$  (n=20 cells); K11E:  $6.40 \pm 0.36$  (n=21 cells); exogenous + endogenous PSD-95: WT:  $12.92 \pm 1.16$  (n=19 cells); K10E:  $13.22 \pm 1.13$  (n=20 cells); K11E:  $12.76 \pm 0.69$  (n=21 cells); from 2 independent experiments)

Statistical significance was tested by 1-way ANOVA with Bonferroni's Multiple Comparison Test (C) or Kruskal-Wallis test followed by Mann-Whitney U test with Bonferroni correction (D-F, H and J).

Figure S7

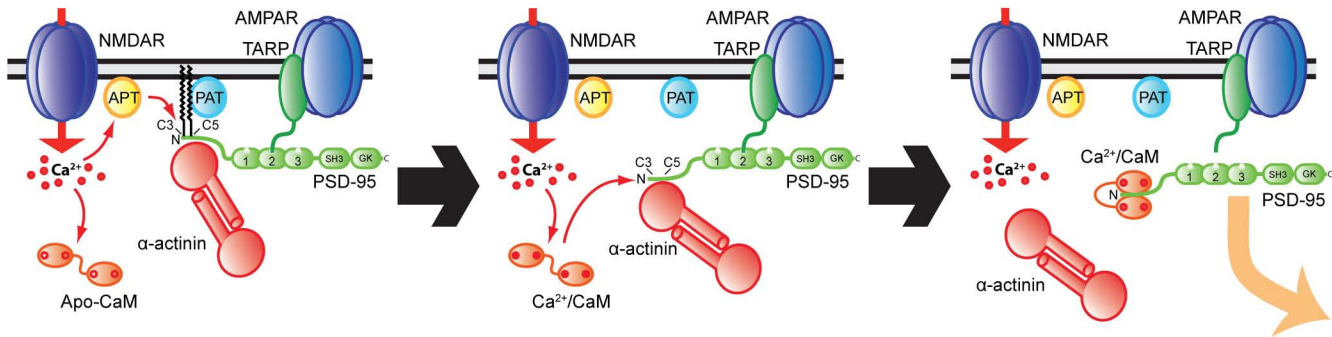

**Figure S7. Model of PSD-95 anchoring by  $\alpha$ -actinin at postsynaptic sites and its release by  $\text{Ca}^{2+}$ /CaM upon  $\text{Ca}^{2+}$  influx, related to Figure 7.**

Under basal conditions (left) binding to  $\alpha$ -actinin and palmitoylation keeps PSD-95 at postsynaptic sites. Palmitoylation is a prerequisite for postsynaptic localization of PSD-95 and is mediated by palmitoyl acyltransferases (PATs). The PAT DHHC2 is selectively localized at postsynaptic sites to augment PSD-95 palmitoylation and thereby postsynaptic retention although other PATs that are not firmly anchored at postsynaptic sites (e.g., DHHC3) contribute to PSD-95 palmitoylation (Fukata et al., 2013). The  $\alpha/\beta$ -hydrolase domain – containing proteins ABHD17A,B, and C have recently been identified as palmitoyl thioesterases (PPT) that depalmitoylate PSD-95 (Yokoi et al., 2016).  $\text{Ca}^{2+}$  influx likely stimulates PSD-95 depalmitoylation (El-Husseini et al., 2000), which allows binding of  $\text{Ca}^{2+}$ /CaM to shift the equilibrium of palmitoylated,  $\alpha$ -actinin – bound PSD-95 to non-palmitoylated PSD-95 in part by  $\text{Ca}^{2+}$ /CaM capping the N-terminus of PSD-95, thereby preventing re-palmitoylation (Zhang et al., 2014).  $\text{Ca}^{2+}$ /CaM also competes with and thereby displaces  $\alpha$ -actinin from the N-terminus of PSD-95 when it is depalmitoylated.

## SUPPLEMENTAL TABLES

Table S1. Statistics for Figure 1.

| panel    | condition        | band intensity (AU) | S.E.M |
|----------|------------------|---------------------|-------|
| <b>E</b> |                  |                     |       |
|          | NT-PDZ-1/2       | 181.0               | 30.4  |
|          | PDZ2             | 58.7                | 17.5  |
|          | PDZ3             | 14.3                | 6.6   |
|          | GK               | 5.3                 | 2.9   |
|          | SH3              | 22.0                | 9.0   |
| <b>F</b> |                  |                     |       |
|          | MBP              | 13.4                | 6.8   |
|          | CH1/2            | 182.1               | 28.2  |
|          | SR1              | 13.3                | 8.8   |
|          | SR2              | 31.5                | 18.5  |
|          | SR3              | 216.0               | 24.6  |
|          | SR4              | 29.0                | 4.7   |
|          | EF               | 189.3               | 36.5  |
| <b>G</b> |                  |                     |       |
|          | MBP              | 11.7                | 5.2   |
|          | CH1              | 188.5               | 43.2  |
|          | CH2              | 202.5               | 40.6  |
|          | CH1/2            | 230.8               | 15.8  |
| <b>I</b> |                  |                     |       |
|          | MBP              | 9.0                 | 1.1   |
|          | EF- $\Delta$ PDZ | 66.3                | 11.1  |
|          | EF               | 78.6                | 13.6  |

**Table S2. Statistics for Figure 2.**

| panel                                     | condition      | puncta / $\mu\text{m}$ | S.E.M | intensity (AU) | S.E.M |
|-------------------------------------------|----------------|------------------------|-------|----------------|-------|
| <b>A</b>                                  |                |                        |       |                |       |
| <b><math>\alpha</math>-actinin (ACTN)</b> |                |                        |       |                |       |
|                                           | vector         | 0.66                   | 0.06  | 0.95           | 0.07  |
|                                           | kd124          | 0.43                   | 0.05  | 0.52           | 0.04  |
|                                           | kd124 + rescue | 0.67                   | 0.05  | 0.76           | 0.05  |
|                                           | kd3            | 0.69                   | 0.09  | 0.86           | 0.11  |
| <b>synapsin</b>                           |                |                        |       |                |       |
|                                           | vector         | 0.92                   | 0.04  | 2.21           | 0.23  |
|                                           | kd124          | 0.65                   | 0.04  | 2.33           | 0.26  |
|                                           | kd124 + rescue | 0.99                   | 0.06  | 2.44           | 0.30  |
|                                           | kd3            | 0.89                   | 0.05  | 2.68           | 0.33  |
| <b>B</b>                                  |                |                        |       |                |       |
| <b>PSD-95</b>                             |                |                        |       |                |       |
|                                           | vector         | 0.96                   | 0.08  | 1.8            | 0.2   |
|                                           | kd124          | 0.57                   | 0.06  | 1.1            | 0.1   |
|                                           | kd124 + rescue | 0.88                   | 0.09  | 1.6            | 0.1   |
|                                           | kd3            | 0.93                   | 0.10  | 1.7            | 0.2   |
| <b>GluA1<sup>EC</sup></b>                 |                |                        |       |                |       |
|                                           | vector         | 0.76                   | 0.06  | 0.98           | 0.07  |
|                                           | kd124          | 0.41                   | 0.05  | 0.74           | 0.06  |
|                                           | kd124 + rescue | 0.76                   | 0.08  | 0.95           | 0.16  |
|                                           | kd3            | 0.79                   | 0.08  | 0.94           | 0.09  |
| <b>C</b>                                  |                |                        |       |                |       |
| <b>phalloidin</b>                         |                |                        |       |                |       |
|                                           | vector         | 0.68                   | 0.07  | 1.4            | 0.1   |
|                                           | kd124          | 0.35                   | 0.03  | 1.1            | 0.1   |
|                                           | kd124 + rescue | 0.52                   | 0.04  | 1.6            | 0.1   |
|                                           | kd3            | 0.64                   | 0.06  | 1.5            | 0.1   |
| <b>D</b>                                  |                |                        |       |                |       |
| <b>PSD-93</b>                             |                |                        |       |                |       |
|                                           | vector         | 0.51                   | 0.05  | 0.97           | 0.06  |
|                                           | kd124          | 0.34                   | 0.03  | 0.91           | 0.08  |
|                                           | kd124 + rescue | 0.52                   | 0.04  | 0.94           | 0.04  |
|                                           | kd3            | 0.50                   | 0.06  | 0.86           | 0.05  |
| <b>GluA2<sup>EC</sup></b>                 |                |                        |       |                |       |
|                                           | vector         | 0.47                   | 0.04  | 0.72           | 0.03  |
|                                           | kd124          | 0.32                   | 0.04  | 0.76           | 0.04  |
|                                           | kd124 + rescue | 0.48                   | 0.05  | 0.77           | 0.04  |
|                                           | kd3            | 0.48                   | 0.05  | 0.72           | 0.04  |
| <b>E</b>                                  |                |                        |       |                |       |
| <b>GluN1<sup>EC</sup></b>                 |                |                        |       |                |       |
|                                           | vector         | 0.71                   | 0.08  | 0.91           | 0.04  |
|                                           | kd124          | 0.42                   | 0.05  | 0.95           | 0.06  |
|                                           | kd124 + rescue | 0.70                   | 0.07  | 0.98           | 0.05  |
|                                           | kd3            | 0.75                   | 0.09  | 1.03           | 0.04  |
| <b>F</b>                                  |                |                        |       |                |       |
| <b>SAP102</b>                             |                |                        |       |                |       |
|                                           | vector         | 0.90                   | 0.08  | 0.96           | 0.05  |
|                                           | kd124          | 0.21                   | 0.03  | 0.77           | 0.06  |
|                                           | kd124 + rescue | 0.80                   | 0.07  | 0.85           | 0.05  |
|                                           | kd3            | 0.69                   | 0.07  | 1.08           | 0.08  |
| <b>G</b>                                  |                |                        |       |                |       |
| <b>SAP97</b>                              |                |                        |       |                |       |
|                                           | vector         | 0.64                   | 0.09  | 1.06           | 0.043 |
|                                           | kd124          | 0.43                   | 0.07  | 1.08           | 0.055 |
|                                           | kd124 + rescue | 0.66                   | 0.10  | 0.97           | 0.064 |
|                                           | kd3            | 0.60                   | 0.08  | 0.88           | 0.050 |



**Table S3. Statistics for Figure 4.**

| panel    | condition                   |                                    |              |
|----------|-----------------------------|------------------------------------|--------------|
| <b>B</b> |                             | <b>expression level (AU)</b>       | <b>S.E.M</b> |
|          | RFP                         | 0.312                              | 0.018        |
|          | PSD-95 <sup>WT</sup>        | 0.407                              | 0.019        |
|          | PSD-95 <sup>K10E</sup>      | 0.382                              | 0.036        |
|          | PSD-95 <sup>K11E</sup>      | 0.383                              | 0.023        |
|          | PSD-95 <sup>KK10,11EE</sup> | 0.378                              | 0.030        |
| <b>C</b> |                             | <b>synaptic RFP intensity (AU)</b> | <b>S.E.M</b> |
|          | RFP                         | 0.41                               | 0.02         |
|          | PSD-95 <sup>WT</sup>        | 1.00                               | 0.84         |
|          | PSD-95 <sup>K10E</sup>      | 0.74                               | 0.06         |
|          | PSD-95 <sup>K11E</sup>      | 0.71                               | 0.05         |
|          | PSD-95 <sup>KK10,11EE</sup> | 0.66                               | 0.09         |
| <b>D</b> |                             | <b>synaptic enrichment factor</b>  | <b>S.E.M</b> |
|          | RFP                         | 1.05                               | 0.02         |
|          | PSD-95 <sup>WT</sup>        | 1.77                               | 0.06         |
|          | PSD-95 <sup>K10E</sup>      | 1.57                               | 0.04         |
|          | PSD-95 <sup>K11E</sup>      | 1.48                               | 0.05         |
|          | PSD-95 <sup>KK10,11EE</sup> | 1.31                               | 0.04         |

**Table S4. Statistics for Figure 5.**

| panel                       | condition                   |                                                       |               |
|-----------------------------|-----------------------------|-------------------------------------------------------|---------------|
| <b>A</b>                    |                             | <b>GluA1<sup>EC</sup> puncta / <math>\mu</math>m</b>  | <b>S.E.M</b>  |
|                             | RFP                         | 0.021                                                 | 0.006         |
|                             | PSD-95 <sup>WT</sup>        | 0.128                                                 | 0.021         |
|                             | PSD-95 <sup>K10E</sup>      | 0.017                                                 | 0.004         |
|                             | PSD-95 <sup>K11E</sup>      | 0.024                                                 | 0.008         |
|                             | PSD-95 <sup>KK10,11EE</sup> | 0.028                                                 | 0.007         |
|                             |                             | <b>relative synaptic GluA1<sup>EC</sup> intensity</b> | <b>S.E.M</b>  |
|                             | RFP                         | 0.93                                                  | 0.06          |
|                             | PSD-95 <sup>WT</sup>        | 1.83                                                  | 0.33          |
|                             | PSD-95 <sup>K10E</sup>      | 0.97                                                  | 0.09          |
| PSD-95 <sup>K11E</sup>      | 0.91                        | 0.05                                                  |               |
| PSD-95 <sup>KK10,11EE</sup> | 1.09                        | 0.08                                                  |               |
| <b>B</b>                    |                             | <b>mEPSC frequency (Hz)</b>                           | <b>S.E.M</b>  |
|                             | RFP                         | 0.40                                                  | 0.15          |
|                             |                             | 2.17                                                  | 0.24          |
|                             | PSD-95 <sup>K10E</sup>      | 0.49                                                  | 0.21          |
|                             | PSD-95 <sup>K11E</sup>      | 0.54                                                  | 0.13          |
|                             | PSD-95 <sup>KK10,11EE</sup> | 0.64                                                  | 0.29          |
|                             |                             | <b>mEPSC amplitude (pA)</b>                           | <b>S.E.M.</b> |
|                             | RFP                         | -5.9                                                  | 0.3           |
|                             | PSD-95 <sup>WT</sup>        | -11.3                                                 | 1.2           |
|                             | PSD-95 <sup>K10E</sup>      | -6.4                                                  | 0.9           |
|                             | PSD-95 <sup>K11E</sup>      | -6.8                                                  | 0.5           |
|                             | PSD-95 <sup>KK10,11EE</sup> | -6.9                                                  | 0.5           |
|                             |                             | <b>decay time (ms)</b>                                | <b>S.E.M.</b> |
|                             | RFP                         | 7.6                                                   | 0.1           |
|                             | PSD-95 <sup>WT</sup>        | 7.5                                                   | 0.4           |
| PSD-95 <sup>K10E</sup>      | 7.6                         | 0.1                                                   |               |
| PSD-95 <sup>K11E</sup>      | 8.1                         | 0.2                                                   |               |
| PSD-95 <sup>KK10,11EE</sup> | 8.1                         | 0.2                                                   |               |
| <b>C</b>                    |                             | <b>GluN1<sup>EC</sup> puncta / <math>\mu</math>m</b>  | <b>S.E.M</b>  |
|                             | RFP                         | 0.20                                                  | 0.02          |
|                             | PSD-95 <sup>WT</sup>        | 0.19                                                  | 0.03          |
|                             | PSD-95 <sup>K10E</sup>      | 0.22                                                  | 0.03          |
|                             | PSD-95 <sup>K11E</sup>      | 0.21                                                  | 0.03          |
|                             | PSD-95 <sup>KK10,11EE</sup> | 0.20                                                  | 0.03          |
|                             |                             | <b>relative synaptic GluA1<sup>EC</sup> intensity</b> | <b>S.E.M</b>  |
|                             | RFP                         | 1.00                                                  | 0.04          |
|                             | PSD-95 <sup>WT</sup>        | 1.13                                                  | 0.05          |
|                             | PSD-95 <sup>K10E</sup>      | 1.07                                                  | 0.09          |
| PSD-95 <sup>K11E</sup>      | 0.83                        | 0.06                                                  |               |
| PSD-95 <sup>KK10,11EE</sup> | 0.79                        | 0.07                                                  |               |

**Table S5. Statistics for Figure 6.**

| panel    | condition |                                                    |              |
|----------|-----------|----------------------------------------------------|--------------|
| <b>C</b> |           | <b>Spine PSD-95 intensity (AU)</b>                 | <b>S.E.M</b> |
|          | WT        | 42.53                                              | 4.21         |
|          | ED_KK     | 20.29                                              | 1.83         |
|          | E53K      | 20.72                                              | 2.12         |
| <b>D</b> |           | <b>PSD-95 spine enrichment factor</b>              | <b>S.E.M</b> |
|          | WT        | 5.29                                               | 0.59         |
|          | ED_KK     | 2.38                                               | 0.15         |
|          | E53K      | 3.13                                               | 0.49         |
| <b>E</b> |           | <b>GluA2<sup>EC</sup> spine intensity (AU)</b>     | <b>S.E.M</b> |
|          | WT        | 64.47                                              | 5.73         |
|          | ED_KK     | 38.57                                              | 2.90         |
|          | E53K      | 33.99                                              | 2.18         |
| <b>F</b> |           | <b>GluA2<sup>EC</sup> puncta/<math>\mu</math>m</b> | <b>S.E.M</b> |
|          | WT        | 0.51                                               | 0.03         |
|          | ED_KK     | 0.29                                               | 0.04         |
|          | E53K      | 0.32                                               | 0.03         |
| <b>H</b> |           | <b>Spine PSD-95 intensity (AU)</b>                 | <b>S.E.M</b> |
|          | WT        | 21.70                                              | 3.90         |
|          | K10E      | 8.86                                               | 0.98         |
|          | K11E      | 10.35                                              | 0.96         |
| <b>I</b> |           | <b>PSD-95 spine enrichment factor</b>              | <b>S.E.M</b> |
|          | WT        | 4.80                                               | 0.40         |
|          | K10E      | 2.05                                               | 0.14         |
|          | K11E      | 2.55                                               | 0.21         |
| <b>J</b> |           | <b>GluA2<sup>EC</sup> spine intensity (AU)</b>     | <b>S.E.M</b> |
|          | WT        | 33.70                                              | 4.67         |
|          | K10E      | 19.98                                              | 1.46         |
|          | K11E      | 18.81                                              | 1.29         |
| <b>K</b> |           | <b>GluA2<sup>EC</sup> puncta/<math>\mu</math>m</b> | <b>S.E.M</b> |
|          | WT        | 0.71                                               | 0.04         |
|          | K10E      | 0.48                                               | 0.03         |
|          | K11E      | 0.52                                               | 0.04         |

**Table S6. Statistics for Figure 7.**

| <b>panel</b> | <b>condition</b> |                       |              |
|--------------|------------------|-----------------------|--------------|
| <b>B</b>     |                  | <b>Signal ratio %</b> | <b>S.E.M</b> |
|              | No treatment     | 97.84                 | 8.98         |
|              | NMDA             | 19.84                 | 3.72         |
|              | CMZ+NMDA         | 96.83                 | 7.12         |
|              | W7+NMDA          | 100.00                | 7.94         |
|              | TFP +NMDA        | 94.33                 | 10.67        |
| <b>C</b>     |                  | <b>Signal ratio %</b> | <b>S.E.M</b> |
|              | No treatment     | 100.01                | 19.88        |
|              | NMDA             | 257.14                | 37.12        |
|              | CMZ+NMDA         | 96.46                 | 26.96        |
|              | W7+NMDA          | 96.43                 | 18.56        |
|              | TFP +NMDA        | 92.86                 | 27.89        |

**Table S7. Fluorescent stainings performed in the present study.**

| <b>channel<br/>staining</b>                                         | <b>405 nm</b>             | <b>488 nm</b>    | <b>555 nm</b>             | <b>647 nm</b>          |
|---------------------------------------------------------------------|---------------------------|------------------|---------------------------|------------------------|
| <b>Characterization of <math>\alpha</math>-actinin knock-down</b>   |                           |                  |                           |                        |
| Figure 2A                                                           | synapsin                  | GFP              | $\alpha$ -actinin (EA-53) | bassoon <sup>a</sup>   |
| Figure 2B                                                           | PSD-95                    | GFP              | GluA1 <sup>EC</sup>       | Shank <sup>a</sup>     |
| Figure 2C                                                           | synapsin <sup>a</sup>     | GFP              | phalloidin                | Shank <sup>a</sup>     |
| Figure 2D                                                           | synapsin <sup>a</sup>     | GFP              | GluA2 <sup>EC</sup>       | PSD-93                 |
| Figure 2E                                                           | synapsin <sup>a</sup>     | GFP              | GluN1 <sup>EC</sup>       | bassoon <sup>a</sup>   |
| Figure 2F                                                           | synapsin <sup>a</sup>     | GFP              | SAP102                    |                        |
| Figure 2G                                                           | synapsin <sup>a</sup>     | GFP              | SAP97                     |                        |
| Figure S2                                                           |                           | GFP              |                           |                        |
| Figure S3A                                                          | synapsin <sup>a</sup>     | GFP              | GluN1 <sup>EC</sup>       | bassoon                |
| Figure S3B                                                          | synapsin <sup>a</sup>     | GFP              | Phalloidin                | Shank                  |
| <b>Expression of mutant PSD-95 and <math>\alpha</math>-actinin1</b> |                           |                  |                           |                        |
| Figure 4                                                            | synapsin <sup>a</sup>     | GFP              | RFP                       |                        |
| Figure 5A                                                           | Shank <sup>a</sup>        | GFP              | RFP <sup>b</sup>          | GluA1 <sup>EC</sup>    |
| Figure 5C                                                           | synapsin <sup>a</sup>     | GFP              | RFP <sup>b</sup>          | GluN1 <sup>total</sup> |
| Figure 6B                                                           | $\alpha$ -actinin (Aviva) | GFP              | GluA2 <sup>EC</sup>       | PSD-95                 |
| Figure 6G                                                           | MAP2                      | GFP <sup>c</sup> | GluA2 <sup>EC</sup>       | PSD-95                 |
| Figure S4                                                           | synapsin <sup>a</sup>     | GFP              | RFP                       |                        |
| Figure S5                                                           |                           | GFP              |                           |                        |
| Figure S6G                                                          |                           | phalloidin       | DsRed                     |                        |

<sup>a, b, c</sup> Fluorescent signals to identify synaptic sites (<sup>a</sup>) and neurons expressing RFP-PSD-95 (<sup>b</sup>) or PSD-95-GFP (<sup>c</sup>) without being depicted.
